# Supplementary material
Source: Royal Society of Chemistry journal article supplement (doi:10.1039/d6mh00473c)
Supplement: d6mh00473c1.pdf [file d6mh00473c1.pdf]

# Supporting Information

## **Unidirectional ion transport induced moisture-electric generation with persistent current output for self-powered monitoring system**

Shunli Wu<sup>†a</sup>, Bingsen Wang<sup>†b</sup>, Xiaohu Ren<sup>a\*</sup>, Hongfeng Yin<sup>a</sup>, Hudie Yuan<sup>a</sup>,  
Mingchang Zhang<sup>c\*</sup>, Yuchi Liu<sup>a</sup>, Zhijun Wu<sup>c</sup>, Wengang Cui<sup>c</sup>, Lin Li<sup>b\*</sup>

a. College of Materials Science and Engineering, Xi'an University of Architecture and Technology, Xi'an, 710055, China

b. School of Energy and Power Engineering, Key Laboratory of Ocean Energy Utilization and Energy Conservation of Ministry of Education, Dalian University of Technology, Dalian 116024, China

c. Institute of Science and Technology for New Energy, Xi'an Technological University, Xi'an, 710021, China

† These authors contributed equally

\*Corresponding Author:

Xiaohu Ren, [renxiaohu@xauat.edu.cn](mailto:renxiaohu@xauat.edu.cn)

Lin Li, [lilinnd@dlut.edu.cn](mailto:lilinnd@dlut.edu.cn)

Mingchang Zhang, [zhangmingchang@xatu.edu.cn](mailto:zhangmingchang@xatu.edu.cn)

## Supplementary Note 1.

### Exfoliation of vermiculite

In this study, a two-step ion-exchange stripping strategy was successfully employed for the controlled preparation of VM nanosheets. Structural characterization revealed (**Figure S1a**) that the pristine thermally expanded vermiculite particles showed a typical lamellar stacking structure, and a stable colloidal dispersion system of vermiculite nanosheets was obtained by the synergistic action of the two-step ion intercalation method and ultrasound (**Figure S1b**), whose significant Tyndall effect confirmed the formation of nanoscale particles. XRD mapping analysis (**Figure S1c**) revealed the key structural evolution: three characteristic diffraction peaks existed for the pristine vermiculite at  $2\theta = 6.2^\circ$ ,  $7.4^\circ$  and  $8.9^\circ$ , where three characteristic diffraction peaks are present, corresponding to the periodically aligned structure of the interlayer hydrated cations ( $\text{Mg}^{2+}$ ). After ion-exchange stripping, only the characteristic peak of (001) crystal surface was retained, indicating that the interlayer cations were effectively removed and accompanied by interlayer swelling effect. Atomic force microscopy (AFM) characterization (**Figure S1d**) confirms that the exfoliated products are large-sized 2D nanosheets with lateral dimensions up to  $2\ \mu\text{m}$  and an average thickness of  $3.8\ \text{nm}$ , and Fig. f shows that the vermiculite nanosheets have a surface zeta potential up to  $-42.3\ \text{mV}$ . This strong negativity arises from the permanent structural negative charge generated by the homocrystalline substitution of  $\text{Al}^{3+}$  for  $\text{Si}^{4+}$  in the laminate octahedra.

### Preparation of bottom electrode.

Firstly, the conductive carbon nanotubes (CNTs) paste was uniformly coated on the surface of PET substrate by brush scraping method, and dried and cured at room temperature. Then, the acid-modified carbon nanotube dispersion was applied three times on the surface of the substrate, and the solvent volatilization process was performed at each drop coating interval of 15 minutes. Through this gradient functionalization strategy, the composite electrode interface with hierarchical structure is finally obtained.

## Supplementary Note 2.

Equations and parameters for finite-element method calculations:

To investigate the electrodynamics of the SVA-MEG power generation process, a 3D geometric model for wet air-driven SVA-MEG power generation was developed by coupling the Nernst-Planck equation with the Poisson equation, and finite element simulations were performed. For the Nernst-Planck equation,  $J_i$  is the flux vector of the ion concentration determined by the convective flux, concentration diffusion, and electromigration flux

$$J_i = n_i u - D_i \nabla n_i - \frac{z_i e n_i D_i}{k_b T} \nabla \varphi \quad (1)$$

where  $n_i$  is the proton concentration,  $u$  is the fluid velocity,  $D_i$  is the diffusion coefficient,  $z_i$  is the valence,  $e$  is the elementary charge,  $k_b$  is the Boltzmann constant,  $T$  is the temperature, and  $\varphi$  is the double electric layer potential. Based on the Gauss electrostatic theorem, the Poisson equation is given

$$\nabla(\varepsilon_r \varepsilon_0 \nabla \varphi) = -\rho_e u = -F \sum_{i=1}^N z_i n_i \quad (2)$$

where  $\varepsilon_r$  is the dielectric constant of the water,  $\varepsilon_0$  is the permittivity of vacuum,  $\rho_e$  is the density of electrostatic charge, and  $F$  is the Faraday constant.

The two Equations can be numerically solved with the aid of COMSOL software so as to determine the proton concentration and potential distribution. In the numerical simulation, the permittivity of PSS/PVA is assumed to be 60 and of the SA/VM aerogel is assumed to be 6. To facilitate simulations, SVA-MEG is idealized as a cylinder with a radius of 10mm and a diameter of 4.4 mm, where the PSS/PVA has a thickness of 0.1mm. It is assumed that our system can be quantitatively explained by the equations with appropriate boundary conditions. The simulated temperature is 298 K, the diffusion coefficient of water is  $1e^{-12}$  m<sup>2</sup>/s at PSS/PVA. The diffusion coefficient of proton is  $0.5 e^{-13}$  m<sup>2</sup>/s at SA/VM aerogel. The proton flux and potential at boundaries satisfies the condition.

$$\vec{n} \cdot J_i = 0 \quad \text{and} \quad \vec{n} \cdot \vec{D} = 0 \quad (3)$$

To describe the dissociation of protons from the SVA-MEG after water infiltrating, a chemical reaction,  $\text{RSO}_3\text{H} + \text{H}_2\text{O} \rightleftharpoons \text{RSO}_3^- + \text{H}_3\text{O}^+$ , is employed in the SVA-MEG domain by the “chemistry” module. The reaction rate constant is described using the Arrhenius equation. The concentration of surface functional groups ( $\text{RSO}_3\text{H}$ ) in the SVA-MEG domain was set to is  $1 \times 10^{-8} \text{ mol/m}^3$ .

### Supplementary Note 3

The energy conversion properties of the SA/VM aerogel are studied by measuring  $I$ – $V$  curves in presence of a transmembrane salinity gradient. The Figure S19a shows the equivalent circuit of the membrane.  $V_{OC}$ ,  $V_{redox}$ ,  $E_{diff}$ , and the  $R_{SA/VM \text{ aerogel}}$  represent the measured open-circuit voltage, the redox potential generated by the unequal potential drop at the electrode-solution interface, the diffusion potential contributed by the cation selective VM-CNF/CNT membrane, and the internal resistance of the membrane, respectively. The measured  $V_{OC}$  actually consists of two parts:  $V_{redox}$  and  $E_{diff}$ , which satisfy the following equation:

$$V_{OC} = V_{redox} + E_{diff} \quad (4)$$

In this work, the generated osmotic voltage and osmotic current were obtained by subtracting the contribution from the redox potential on Ag/AgCl electrodes in different concentrations.

The transference number  $t_+$  is calculated following the equation.

$$t_+ = \frac{1}{2} \left( \frac{E_{diff}}{\frac{RT}{zF} \ln \left( \frac{\gamma_{CH} c_H}{\gamma_{CL} c_L} \right)} + 1 \right) \quad (5)$$

where  $t_+$  is the cation transference number;  $E_{diff}$  refers to the diffusion potential;  $R$ ,  $T$ ,  $z$ ,  $F$ , refer to the universal gas constant, absolute temperature, valence charge and Faraday constant, respectively;  $\gamma$  and  $c$  refer to ion activity coefficient and concentration. The KCl aqueous solution with different concentration and the ion activity coefficients of dilute solutions could be calculated using the simplified Debye-Hückel equation.

$$\lg \gamma_{\pm} = -A |z_+ z_-| \sqrt{I} \quad (6)$$

where  $\gamma_{\pm}$  is ion average activity coefficient, 'I' is the ionic strength, z is ion valence number, and A is constant, the value is about 0.509 at 298 K.

## Theoretical study

All-electron DFT calculations have been carried out by the latest version of ORCA quantum chemistry software (Version 6.1.0)<sup>[1]</sup>. The B3LYP functional<sup>[2-5]</sup> was adopted for all calculations. For geometry optimization calculation, the def2-SVP basis set<sup>[6]</sup> was used, and the optimal geometry for each compound was determined. The single point energy calculations were performed with a larger basis set the def2-TZVP basis set<sup>[7]</sup>. The DFT-D3 dispersion correction with BJ-damping<sup>[8]</sup> was applied to correct the weak interaction to improve the calculation accuracy. The SMD implicit solvation model<sup>[9]</sup> was used to account for the solvation effect.

Then, the interaction energy between XX and XX were calculated by the following formula:  $E_{bind} = E_{complex} - (E_{partA} + E_{partB})$

ESP analysis was performed by Multiwfn package<sup>[10]</sup>.

The visualization of the ESP analysis was achieved using VESTA software.

## The migration energy barriers

To evaluate the migration energy barriers in both bulk and surface models, first-principles calculations were carried out using the CASTEP module based on density functional theory. The exchange–correlation interaction was treated within the generalized gradient approximation (GGA) using the Perdew–Burke–Ernzerhof (PBE) functional. The ion–electron interactions were described using ultrasoft pseudopotentials. A plane-wave cutoff energy of 400 eV was applied after conducting convergence tests. Geometry optimization was performed until the total energy and atomic forces were less than  $1 \times 10^{-5}$  eV/atom and 0.03 eV/Å, respectively. For the slab models, a sufficiently large vacuum thickness (>15 Å) was introduced to avoid artificial interactions between periodic images. The minimum energy migration pathway and corresponding activation energy barriers were calculated using the Linear Synchronous Transit/Quadratic Synchronous Transit (LST/QST) method as implemented in CASTEP, where the transition states were further refined through iterative energy

minimization. All Brillouin zone integrations were performed using Monkhorst–Pack k-point meshes chosen according to the structural dimensions to ensure reliable total energies.

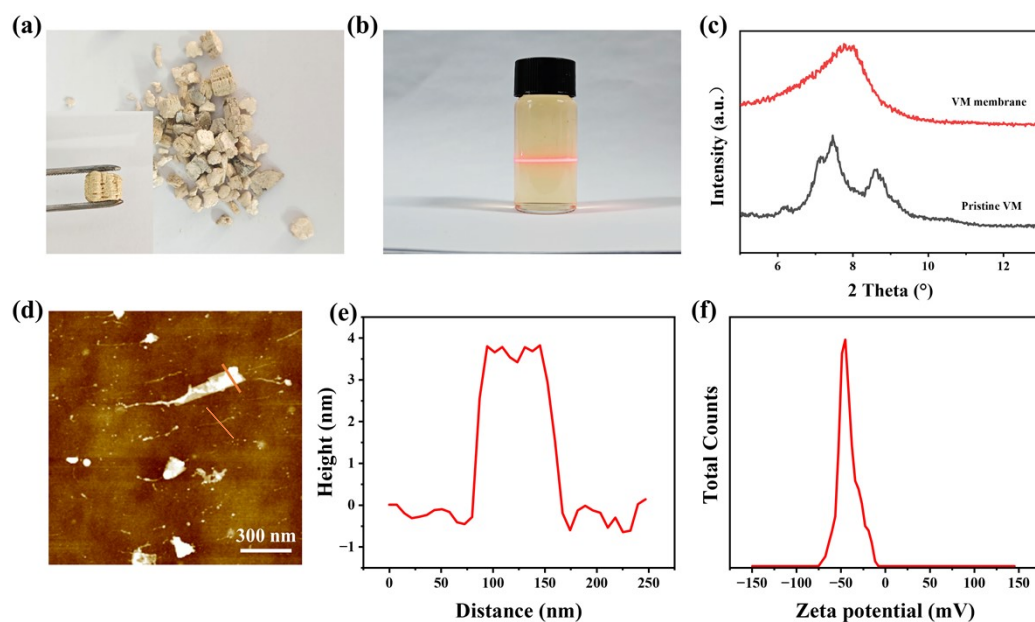

**Figure S1** Preparation and characterization of vermiculite nanosheets (a) Digital photo of vermiculite particles. (b) VM nanosheet dispersion. (c) XRD images of vermiculite particles and vermiculite nanosheet films. (d) AFM images of VM nanosheets and (e) corresponding thickness curves. (f) zeta potential image of vermiculite nanosheet suspension.

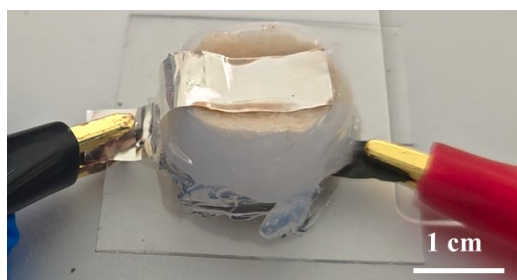

**Figure S2** The optical photograph of SVA-MEG.

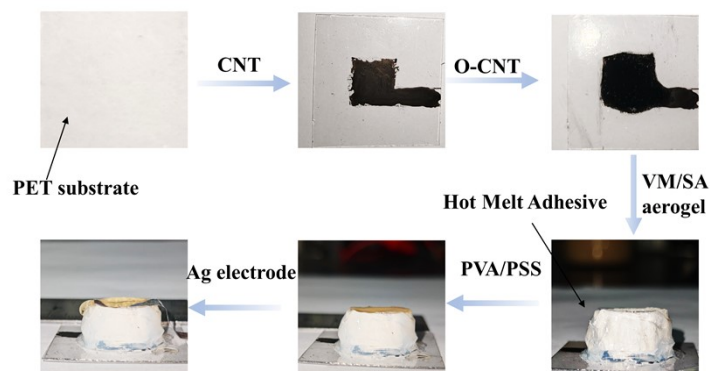

**Figure S3** Schematic diagram of SVA-MEG preparation process.

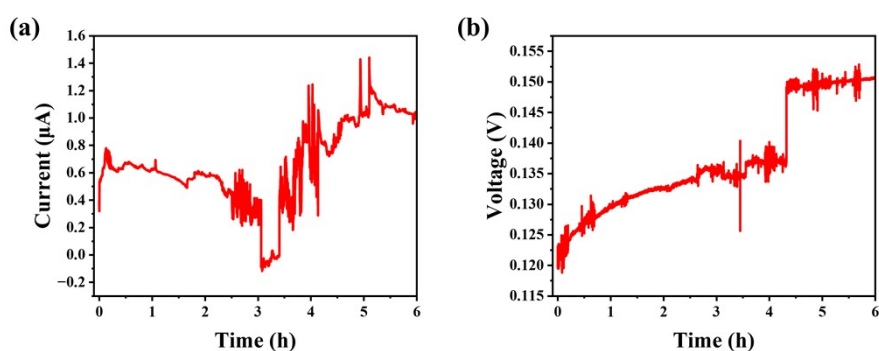

**Figure S4.** The electrical output performance of SVA-MEG devices without the implementation of any sealing strategy

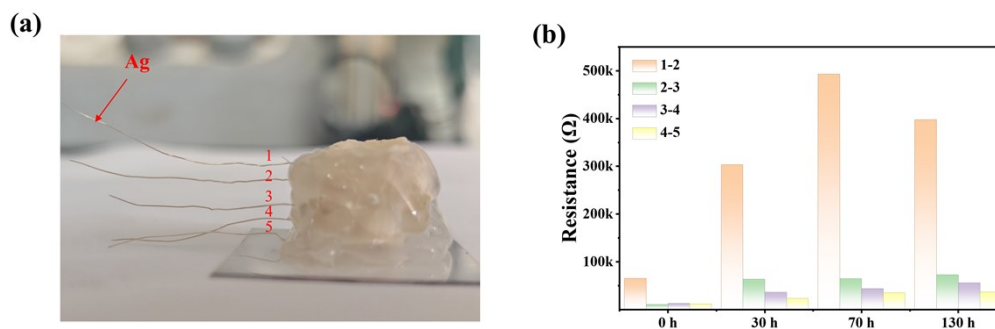

**Figure S5** (a) Schematic illustration of the test setup, with the SVA-MEG sealed around its perimeter using hot melt adhesive. (b) Resistance measured between two electrodes at time points of 0 h, 30 h, 70 h, and 130 h.

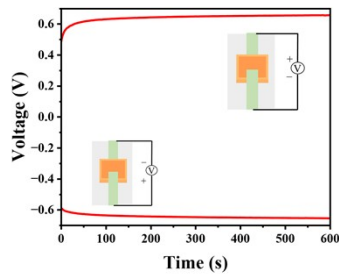

**Figure S6** Effect of electrode inversion on  $V_{OC}$  output.

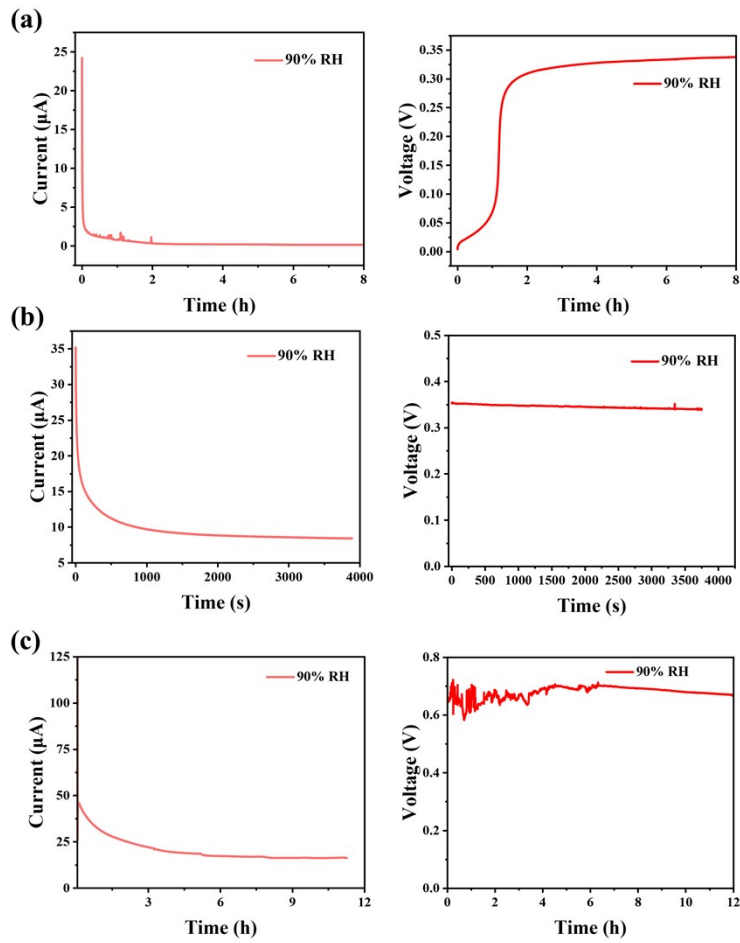

**Figure S7**  $V_{OC}$  and  $I_{SC}$  curve of PSS/PVA (a) SA/VM aerogel (b) and SVA-MEG (c) with time at 90% RH.

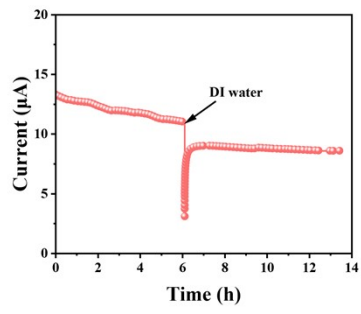

**Figure S8** The curve of  $I_{SC}$  change when adding deionized water.

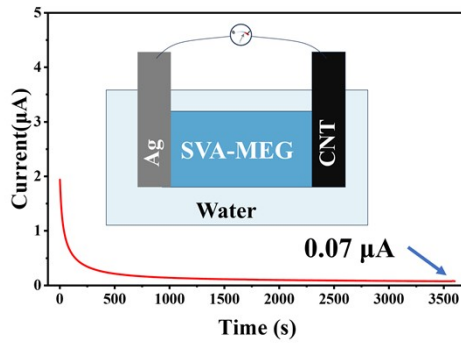

**Figure S9** The  $I_{SC}$  current versus time for the SVA-MEG device immersed in DI water.

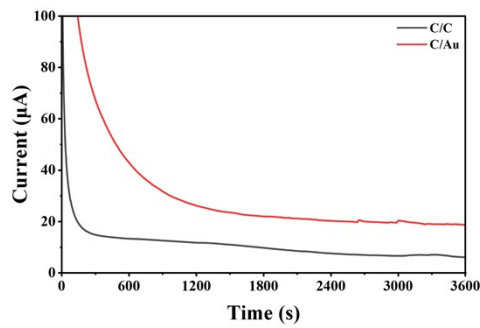

**Figure S10** The  $I_{SC}$  output curves of SVA-MEG with C-C/Au-C electrodes

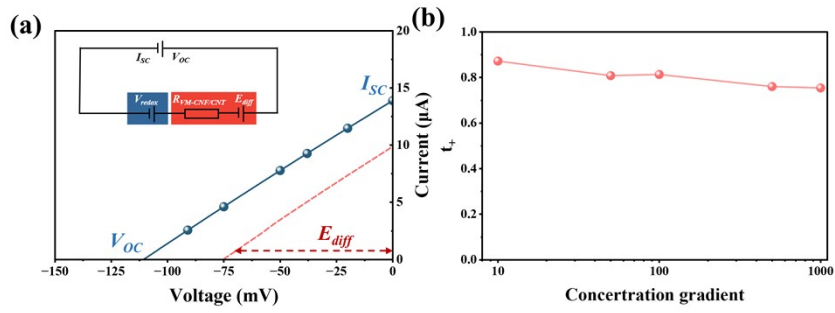

**Figure S11** Comparison of the effect of the position and number of hygroscopic layers on the  $I_{SC}$ . (a) Schematic diagram of the hygroscopic layer at the top and (b) bottom with corresponding current change  $I_{SC}$ .

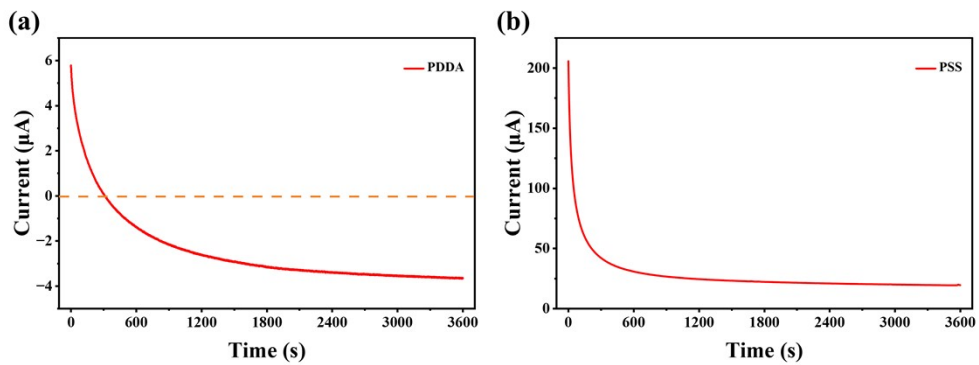

**Figure 12.** Output current curves of the device when the top moisture-absorbing layer is PDDA and PSS respectively.

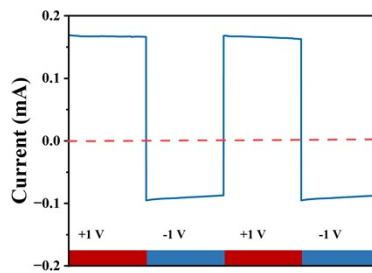

**Figure S13.**  $I$ - $T$  curves of SVA-MEG at 80% RH with an external bias alternating between +1 and -1V.

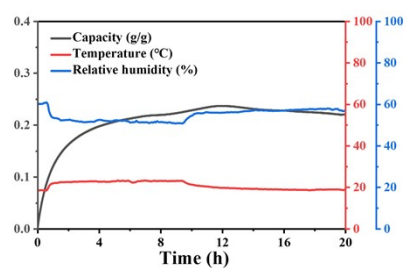

**Figure S14** Hygroscopic dynamics of SVA-MEG.

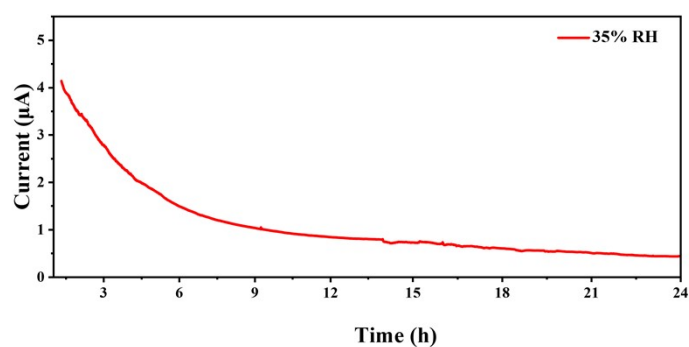

**FigureS15** The  $I_{SC}$  output curve of the SVA-MEG device measured at 35%RH.

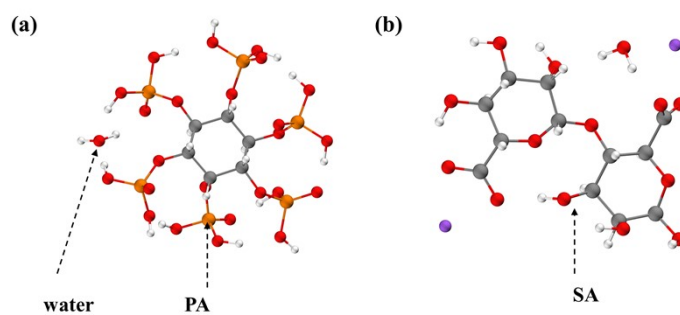

**Figure S16** The corresponding interaction schematic (a) PA-H<sub>2</sub>O and (b)SA-H<sub>2</sub>O.

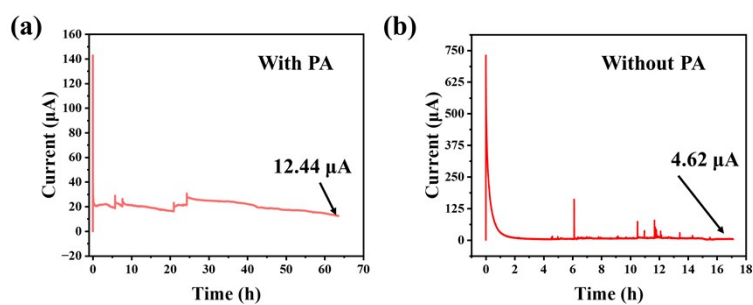

**Figure S17**  $V_{OC}$  and  $I_{SC}$  of SVA-MEG w/o PA were measured at 90% RH.

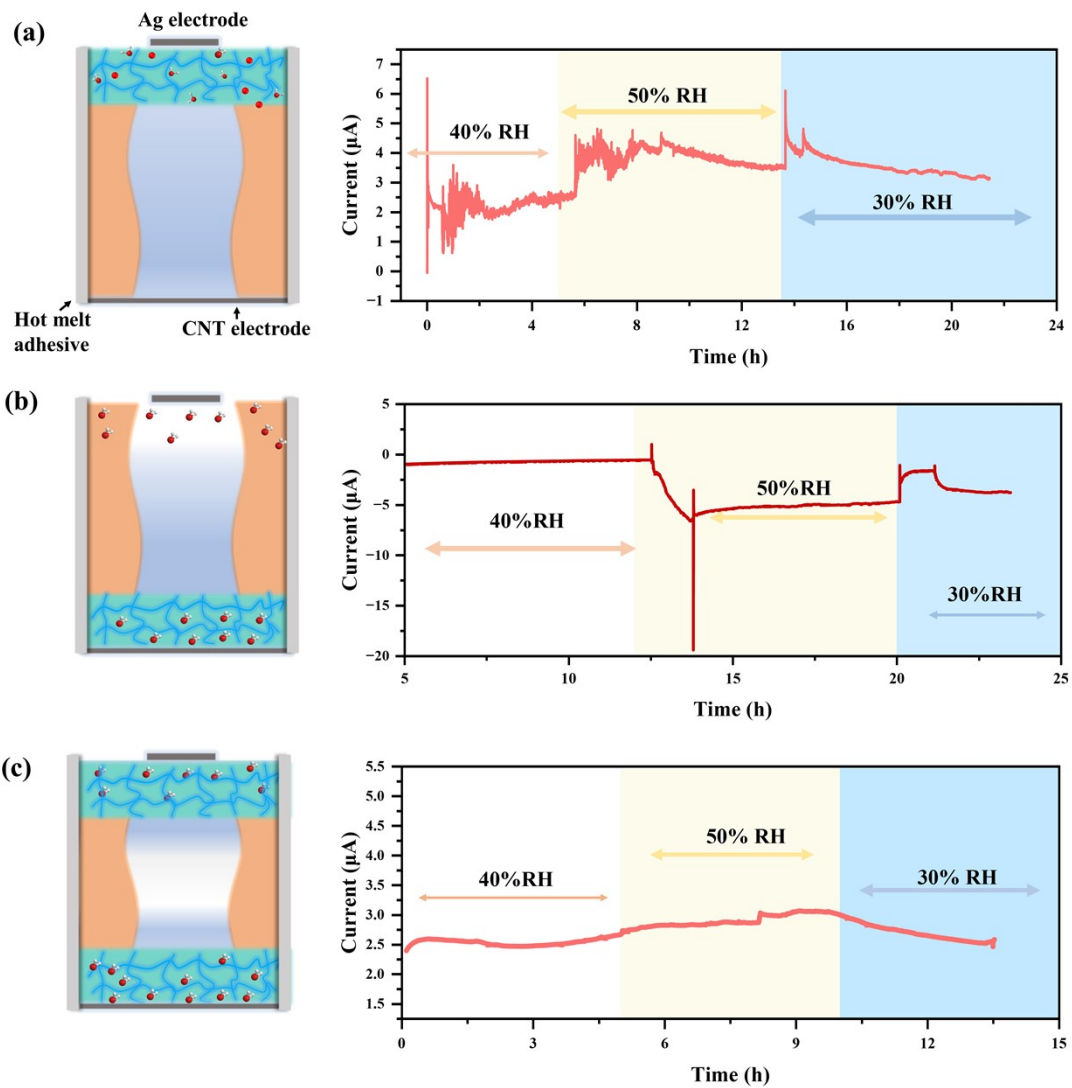

**Figure S18** Comparison of the effect of the position and number of hygroscopic layers on the  $I_{SC}$ . (a) Schematic diagram of the hygroscopic layer at the top and (b) bottom with corresponding current change  $I_{SC}$ . (c) Schematic diagram of the hygroscopic layer at the top and bottom with corresponding  $I_{SC}$  curve.

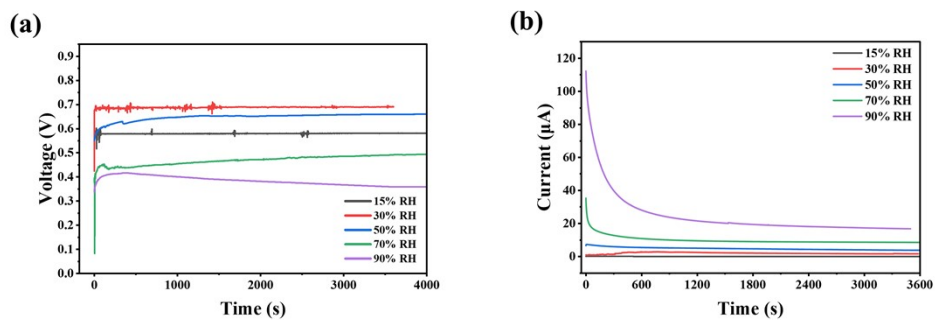

**Figure S19** The curves of the  $V_{OC}$  (a) and  $I_{SC}$  (b) of SV-A-MEG with time under RH conditions of 15%, 30%, 50%, 70%, and 90%.

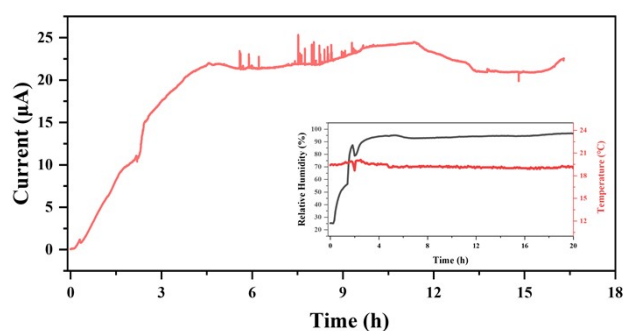

**Figure S20** The  $I_{SC}$  curve at 90% RH after short-circuit connection and vacuum treatment.

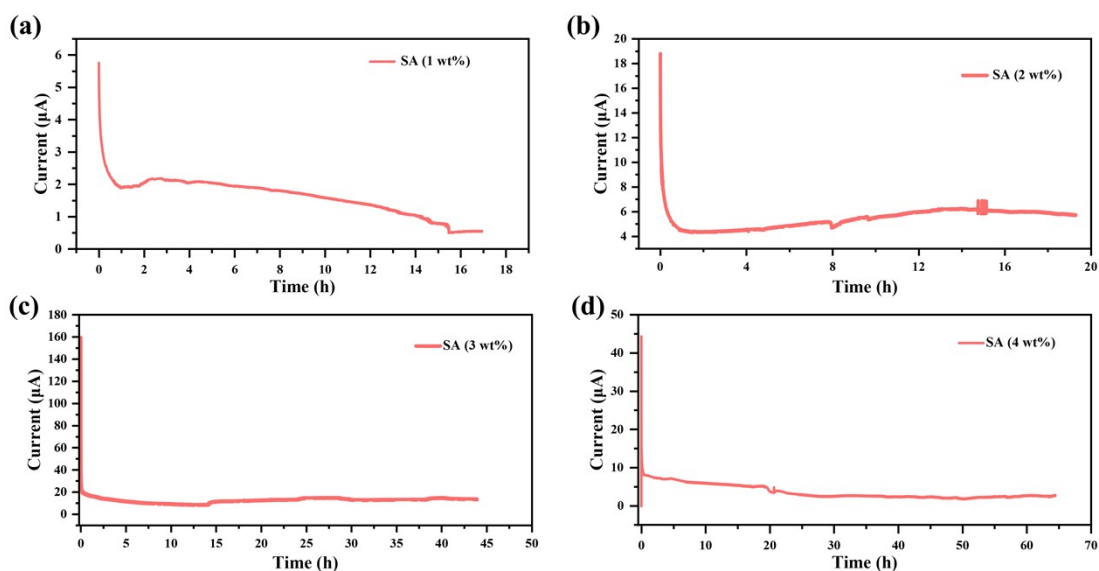

**Figure S21** The  $I_{SC}$  curve of SV-A-MEG with different contents of SA at 90% RH.

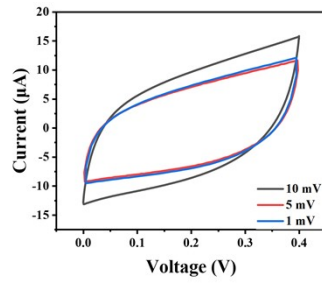

**Figure S22** The Cyclic Voltammetry of SVA-MEG at different sweep speeds.

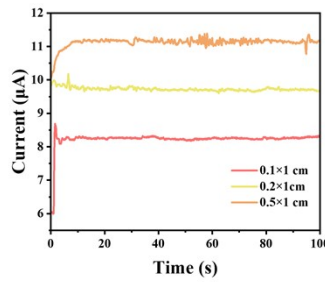

**Figure S23** Effect of different size of top electrode on  $I_{SC}$ .

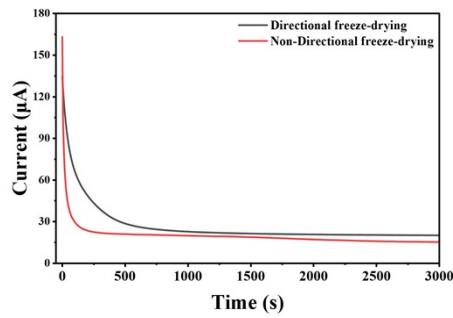

**Figure S24** The  $I_{SC}$  output of directional and non-directional freeze-dried aerogels is compared.

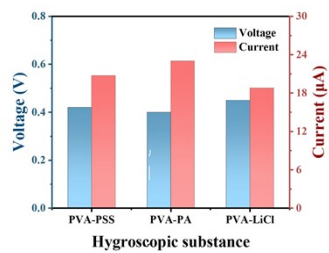

**Figure S25** Comparison of the electrical output performance of SVA-MEG with PSS/PVA, PVA-PA, and PVA-LiCl Hygroscopic Layers.

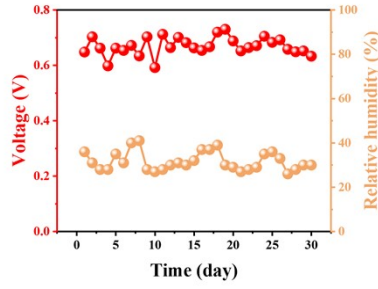

**Figure S26** The  $V_{OC}$  of SVA-MEG was tested continuously for one month.

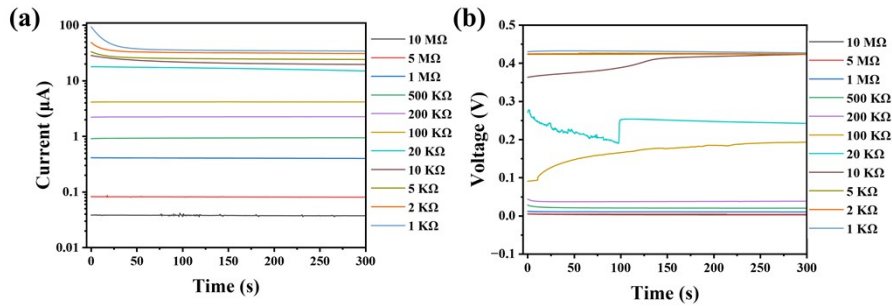

**Figure S27** Curve of voltage and current with time under different resistance at 90% RH. (a) Current curve. (b) Voltage curve.

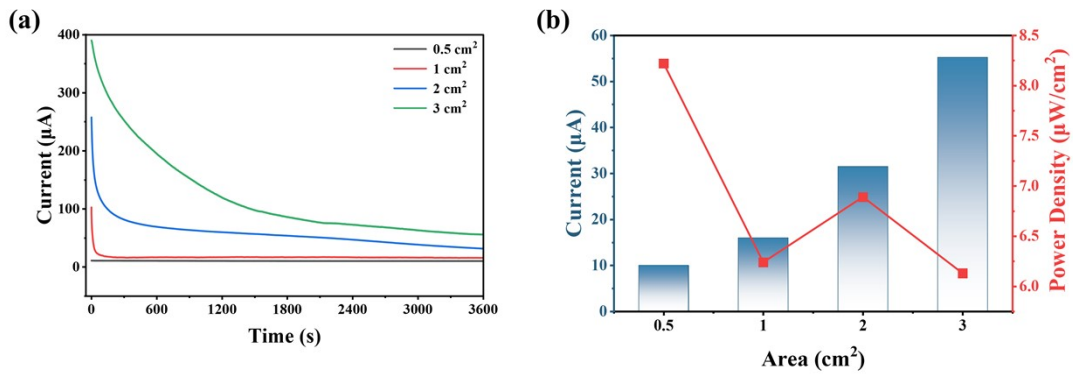

**Figure S28** (a) The  $I_{SC}$  output curves for SVA-MEG devices of different areas. (b) The  $I_{SC}$  output and power density of SVA-MEG with different device areas.

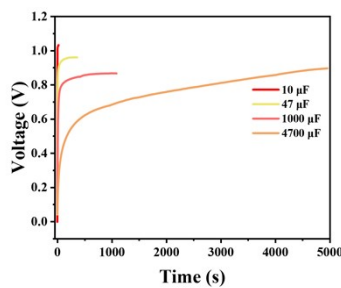

**Figure S29** SVA-MEG charging curves for different capacitors.

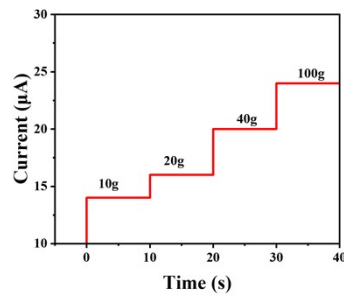

**Figure S30** The  $I_{SC}$  output effect of applying different weights to the top of SVA-MEG.

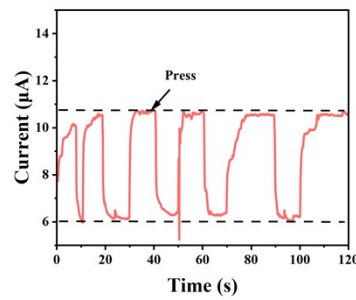

**Figure S31** Curve of  $I_{SC}$  change when pressure is applied and released at the top of the device.

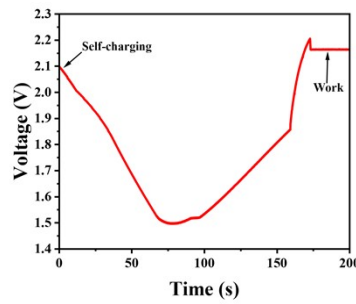

**Figure S32** SVA-MEG provides intermittent power to energy management devices.

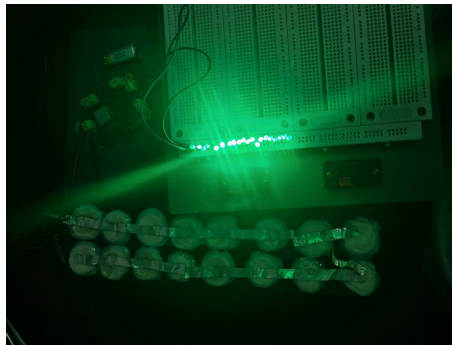

**Figure S33** SVA-MEG array with 14 units powering LEDs.

**Supplementary table S1**

| Concentration<br>(mM/mm)      | gradient | 1/10  | 1/50  | 1/100 | 1/500 | 1/1000 |
|-------------------------------|----------|-------|-------|-------|-------|--------|
| $V_{OS}$ (mV)                 |          | 44    | 62    | 74    | 83    | 90     |
| $V_{thero}$ (mV)              |          | 53    | 105   | 118   | 166   | 174    |
| Transference number ( $t_+$ ) |          | 0.872 | 0.808 | 0.813 | 0.760 | 0.754  |

**Supplementary table S2**

| $V_{OC}$ | $I_{SC}$                        | Continuous<br>work time | Relative<br>Humidity<br>(%) | Ref          | Electrode               |
|----------|---------------------------------|-------------------------|-----------------------------|--------------|-------------------------|
| 1 V      | 1.79 $\mu\text{A}/\text{cm}^2$  | 4.17 h                  | 90%                         | [11]         | C                       |
| 1.1 V    | 17 nA/cm <sup>2</sup>           | 11.7 h                  | 30%                         | [12]         | C                       |
| 0.4 V    | 1.5 $\mu\text{A}/\text{cm}^2$   | 8.3 h                   | 80%                         | [13]         | Au                      |
| 1.2 V    | 50 nA/cm <sup>2</sup>           | 258 h                   | 30%                         | [14]         | C                       |
| 0.5 V    | 0.25 $\mu\text{A}/\text{cm}^2$  | 140 h                   | 80%                         | [15]         | Reassembled<br>Graphite |
| 0.4 V    | 0.12 $\mu\text{A}/\text{cm}^2$  | 8 h                     | 90%                         | [16]         | ITO                     |
| 1.1 V    | 2.6 $\mu\text{A}/\text{cm}^2$   | 13.9 h                  | 90%                         | [17]         | C/Al                    |
| 0.4 V    | 1.75 $\mu\text{A}/\text{cm}^2$  | 3.3 h                   | 95%                         | [18]         | Ag                      |
| 1.25 V   | 2.52 $\mu\text{A}/\text{cm}^2$  | 100 h                   | 90%                         | [19]         | Zn/C                    |
| 0.34 V   | 1 $\mu\text{A}/\text{cm}^2$     | 9 h                     | 80%                         | [20]         | C                       |
| 0.26 V   | 2.59 $\mu\text{A}/\text{cm}^2$  | 168 h                   | 70%                         | [21]         | C                       |
| 0.72 V   | 10.44 $\mu\text{A}/\text{cm}^2$ | > 240 h                 | 90%                         | This<br>work | Ag/C                    |

## References:

- [1] Neese, F. Software Update: The ORCA Program System—Version 6.0. *WIREs Computational Molecular Science* **2025**, *15* (2), e70019. DOI: <https://doi.org/10.1002/wcms.70019>.
- [2] Becke, A. D. Density-functional thermochemistry. III. The role of exact exchange. *The Journal of Chemical Physics* **1993**, *98* (7), 5648-5652. DOI: <https://doi.org/10.1063/1.464913>.
- [3] Lee, C.; Yang, W.; Parr, R. G. Development of the Colle-Salvetti correlation-energy formula into a functional of the electron density. *Physical Review B* **1988**, *37* (2), 785-789. DOI: <https://doi.org/10.1103/PhysRevB.37.785>.
- [4] Vosko, S. H.; Wilk, L.; Nusair, M. Accurate spin-dependent electron liquid correlation energies for local spin density calculations: a critical analysis. *Canadian Journal of Physics* **1980**, *58* (8), 1200-1211. DOI: <https://doi.org/10.1139/p80-159>.
- [5] Stephens, P. J.; Devlin, F. J.; Chabalowski, C. F.; Frisch, M. J. Ab Initio Calculation of Vibrational Absorption and Circular Dichroism Spectra Using Density Functional Force Fields. *The Journal of Physical Chemistry* **1994**, *98* (45), 11623-11627. DOI: <https://doi.org/10.1021/j100096a001>.
- [6] Weigend, F.; Ahlrichs, R. Balanced Basis Sets of Split Valence, Triple Zeta Valence and Quadruple Zeta Valence Quality for H to Rn: Design and assessment of accuracy. *Physical Chemistry Chemical Physics* **2005**, *7* (18), 3297-3305, 10.1039/B508541A. DOI: <https://doi.org/10.1039/B508541A>.
- [7] Binkley, J. S.; Pople, J. A.; Hehre, W. J. Self-consistent Molecular Orbital Methods. 21. Small split-valence basis sets for first-row elements. *Journal of the American Chemical Society* **1980**, *102* (3), 939-947. DOI: <https://doi.org/10.1021/ja00523a008>.
- [8] Grimme, S.; Ehrlich, S.; Goerigk, L. Effect of the Damping Function in Dispersion Corrected Density Functional Theory. *J Comput Chem* **2011**, *32* (7), 1456-1465. DOI: <https://doi.org/10.1002/jcc.21759>.
- [9] Marenich, A. V.; Cramer, C. J.; Truhlar, D. G. Universal Solvation Model Based on Solute Electron Density and on a Continuum Model of the Solvent

Defined by the Bulk Dielectric Constant and Atomic Surface Tensions. *The Journal of Physical Chemistry B* **2009**, *113* (18), 6378-6396. DOI: <https://doi.org/10.1021/jp810292n>.

- [10] Lu, T.; Chen, F. Multiwfn: a Multifunctional Wavefunction Analyzer. *J Comput Chem* **2012**, *33* (5), 580-592. DOI: <https://doi.org/10.1002/jcc.22885> .
- [11] He, W.; Wang, H.; Huang, Y.; He, T.; Chi, F.; Cheng, H.; Liu, D.; Dai, L.; Qu, L. Textile-based Moisture Power Generator with Dual Asymmetric Structure and High Flexibility for Wearable Applications. *Nano Energy* **2022**, *95*, 107017. DOI: <https://doi.org/10.1016/j.nanoen.2022.107017>.
- [12] Zhao, K.; Li, S.; Zan, G.; Kim, G.; Jiang, W.; Park, J. W.; Yoon, J.; Oh, J. H.; Jang, J.; Lee, S.; et al. Moisture-driven Energy Generation by Vertically Structured Polymer Aerogel on Water-collecting gel. *Nano Energy* **2024**, *126*, 109645. DOI: <https://doi.org/10.1016/j.nanoen.2024.109645>.
- [13] Long, Y.; He, P.; Shao, Z.; Li, Z.; Kim, H.; Yao, A. M.; Peng, Y.; Xu, R.; Ahn, C. H.; Lee, S.-W.; et al. Moisture-induced Autonomous Surface Potential Oscillations for Energy Harvesting. *Nature Communications* **2021**, *12* (1), 5287. DOI: <https://doi.org/10.1038/s41467-021-25554-y>.
- [14] Wang, H.; Sun, Y.; He, T.; Huang, Y.; Cheng, H.; Li, C.; Xie, D.; Yang, P.; Zhang, Y.; Qu, L. Bilayer of Polyelectrolyte Films for Spontaneous Power Generation in air up to an Integrated 1,000 V output. *Nature Nanotechnology* **2021**, *16* (7), 811-819. DOI: <https://doi.org/10.1038/s41565-021-00903-6>.
- [15] Moreira, K. S.; Lermen, D.; dos Santos, L. P.; Galembeck, F.; Burgo, T. A. L. Flexible, Low-cost and Scalable, Nanostructured Conductive Paper-based, Efficient Hygroelectric Generator. *Energy & Environmental Science* **2021**, *14* (1), 353-358, 10.1039/D0EE03111A. DOI: <https://doi.org/10.1039/D0EE03111A>.
- [16] Yang, Y. n.; Wang, J.; Wang, Z.; Shao, C.; Han, Y.; Wang, Y.; Liu, X.; Sun, X.; Wang, L.; Li, Y.; et al. Moisture-Electric–Moisture-Sensitive Heterostructure Triggered Proton Hopping for Quality-Enhancing Moist-Electric Generator. *Nano-Micro Letters* **2023**, *16* (1), 56. DOI: <https://doi.org/10.1007/>

[s40820-023-01260-w](#).

- [17] He, T.; Wang, H.; Lu, B.; Guang, T.; Yang, C.; Huang, Y.; Cheng, H.; Qu, L. Fully Printed Planar Moisture-enabled Electric Generator Arrays for Scalable Function Integration. *Joule* **2023**, *7* (5), 935-951. DOI: <https://doi.org/10.1016/j.joule.2023.04.007>.
- [18] He, W.; Li, P.; Wang, H.; Hu, Y.; Lu, B.; Weng, C.; Cheng, H.; Qu, L. Robustly and Intrinsically Stretchable Ionic Gel-Based Moisture-Enabled Power Generator with High Human Body Conformality. *ACS Nano* **2024**, *18* (19), 12096-12104. DOI: <https://doi.org/10.1021/acsnano.3c08543>.
- [19] Zhou, J.; Ren, Z.; Cui, X.; Liu, X.; Lu, X. Bioinspired Interfacial Design of Robust Aramid Nanofiber Composite Films for High-Performance Moisture-Electric Generators. *Advanced Energy Materials* **2025**, *15* (25), 2404840. DOI: <https://doi.org/10.1002/aenm.202404840> (accessed 2025/12/01).
- [20] Xu, C.; Fu, C.; Jiang, Z.; Yang, T.; Xin, M. Hygroelectric Generator Based on Antisymmetric Modification of Graphene Spheres with Ionic Hydrogels. *ACS Applied Nano Materials* **2023**, *6* (7), 5930-5938. DOI: <https://doi.org/10.1021/acsanm.3c00314>.
- [21] Fang, J.; Zhao, Z.; Xu, Z.; Ni, Q. Large-scale and Continuous Production of Sodium Alginate/MWCNTs Axial Heterogeneous Fibers Moisture-electric Generator with Visual Identification of Acid/alkali Gases. *International Journal of Biological Macromolecules* **2025**, *322*, 146897. DOI: <https://doi.org/10.1016/j.ijbiomac.2025.146897>.
